# Supplementary material
Source: publisher figshare collection journal article supplement (https://acs.figshare.com/ndownloader/files/3735223)
Supplement: Supplementary file 1 [file 3735223]

**Supplementary Materials for:**

**Insights into the photoproduction sites of hydroxyl radicals by dissolved  
organic matter in natural waters**

Luni Sun,<sup>†</sup> Jianguo Qian,<sup>‡</sup> Neil V. Blough,<sup>§\*</sup> and Kenneth Mopper<sup>†\*</sup>

<sup>†</sup>Department of Chemistry and Biochemistry, Old Dominion University, Norfolk, Virginia 23529,  
United States

<sup>‡</sup>Department of Chemistry, Washington State University, Pullman, Washington 99164-4630,  
United States

<sup>§</sup>Department of Chemistry and Biochemistry, University of Maryland, College Park, Maryland  
20742-3281, United States

\*Correspondence authors:

E-mail: neilb@umd.edu.

E-mail: kmopper@odu.edu.

**Chemicals:**

The following chemicals were used: phenol (purity grade >99 %, Sigma), benzene (HPLC grade, Sigma), sodium benzoate (99.5 %, Sigma), salicylic acid (99%, Fisher), 3-hydroxybenzoic acid (99%, Acros), 4-hydroxybenzoic acid (99%, Sigma), 2,3-dihydroxybenzoic acid (99%, Sigma), 2,6-dihydroxybenzoic acid (98%, Aldrich), 2,4-dihydroxybenzaldehyde (98 %, Aldrich), 2,5-dihydroxybenzoic acid (99%, Fluka), 2,4-dihydroxybenzoic acid (98%, TCI), ferric chloride (99%, Sigma), 1,10-phenanthroline (99%, Aldrich), potassium oxalate (99%, Baker), 3-Amino-

2,2,5,5,-tetramethyl-1-pyrrolidinyloxy free radical (3-ap) (Sigma), fluorescamine (99%, Fisher), sodium nitrite (99.7%, Fischer), methane (UHP grade, Matheson), H<sub>2</sub>O<sub>2</sub> (35 % w/w, Acros), dimethyl sulfoxide (B&J), methanol (HPLC grade, Acros) and acetonitrile (HPLC grade, EMD). The acetonitrile was dried with anhydrous sodium sulfate (99%, Sigma), which was dried at 200 °C about 4 hours prior to use. Ultra-pure water (Milli-Q water, >18 MΩcm<sup>-1</sup>, Millipore) was used for solution preparation. The buffer solutions were as follows: pH 4.5~5.5 (5 mM acetate buffer), pH 6~7 (5 mM phosphate buffer), pH 8~9 (5 mM borate buffer). Potassium ferrioxalate used for actinometry was prepared by adding three parts 1.5 M potassium oxalate to one part 1 M ferric chloride. The resulting precipitate was recrystallized three times with Milli-Q water and dried in a vacuum oven.

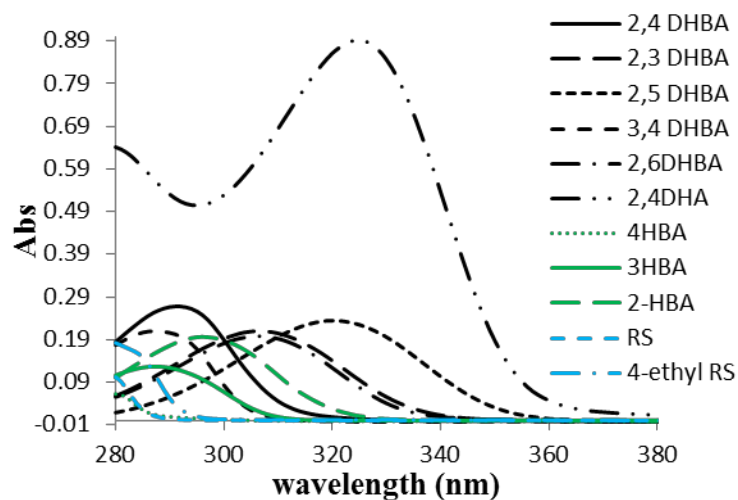

**Fig. S1.** Absorbance spectra of 20 μM model compounds at pH ~7 measured by an Agilent 8453 diode array spectrophotometer with a 3 cm quartz cuvette. NOTATION: DHBA- dihydroxybenzoic acid, HBA - hydroxybenzoic acid, DHA – dihydroxybenzaldehyde, RS- resorcinol.

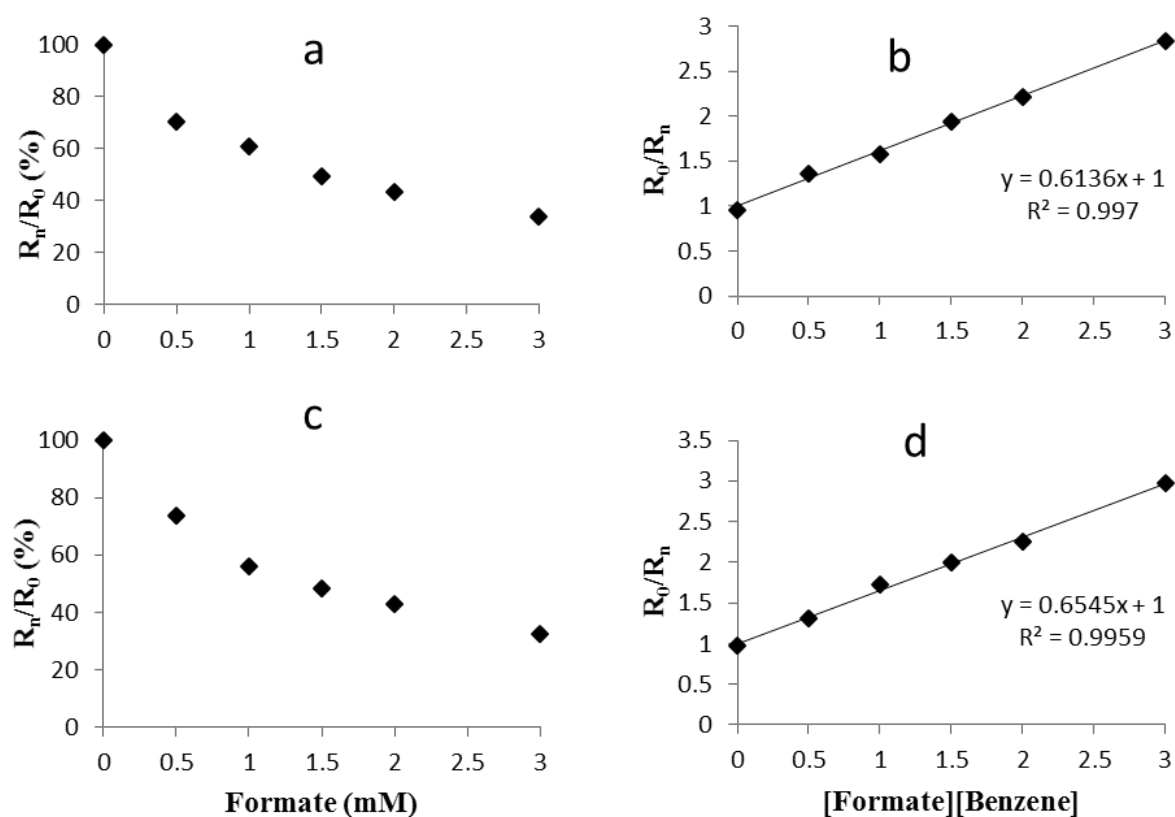

**Fig. S2.** (a) The effect of formate concentration on phenol relative formation rate  $R_n/R_0$  (%); (b)  $R_0/R_n$  vs.  $[\text{formate}]/[\text{benzene}]$  using 2,4- DHBA as the  $\bullet\text{OH}$  source and benzene as the probe; (c) The effect of different formate concentrations on phenol relative formation rate  $R_n/R_0$  (%); (d)  $R_0/R_n$  vs.  $[\text{formate}]/[\text{benzene}]$ ) using  $\text{H}_2\text{O}_2$  as the  $\bullet\text{OH}$  source and benzene as the probe.  $R_n$  is the photoproduct formation rate at a given competitor concentration;  $R_0$  is the photoproduct formation rate with no competitor added.

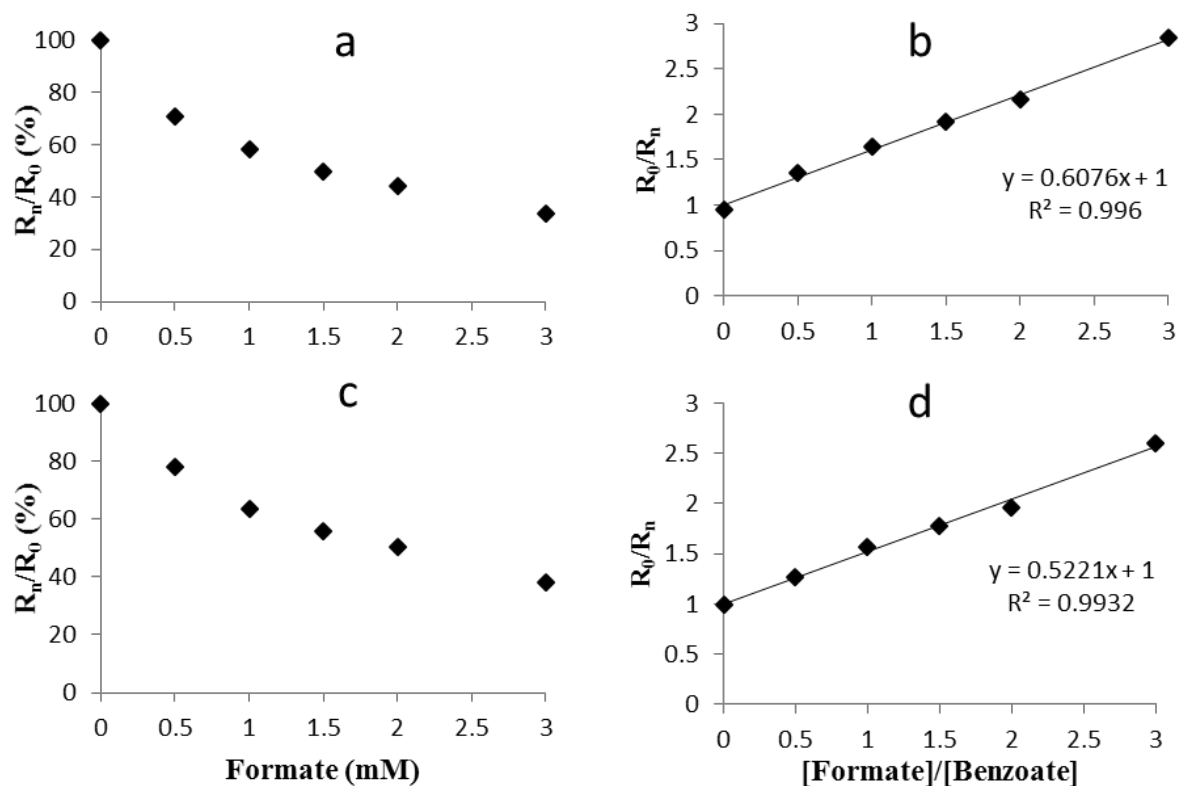

**Fig. S3.** (a) The effect of formate concentration on salicylic acid (SA) relative formation rate  $R_n/R_0$  (%); (b)  $R_0/R_n$  vs.  $[formate]/[benzoate]$  using 2,4- DHBA as the  $\bullet OH$  source and benzoate as the probe; (c) The effect of formate concentration on SA relative formation rate  $R_n/R_0$  (%); (d)  $R_n/R_0$  vs.  $[formate]/[benzoate]$  using  $H_2O_2$  as the  $\bullet OH$  source and benzoate as the probe.

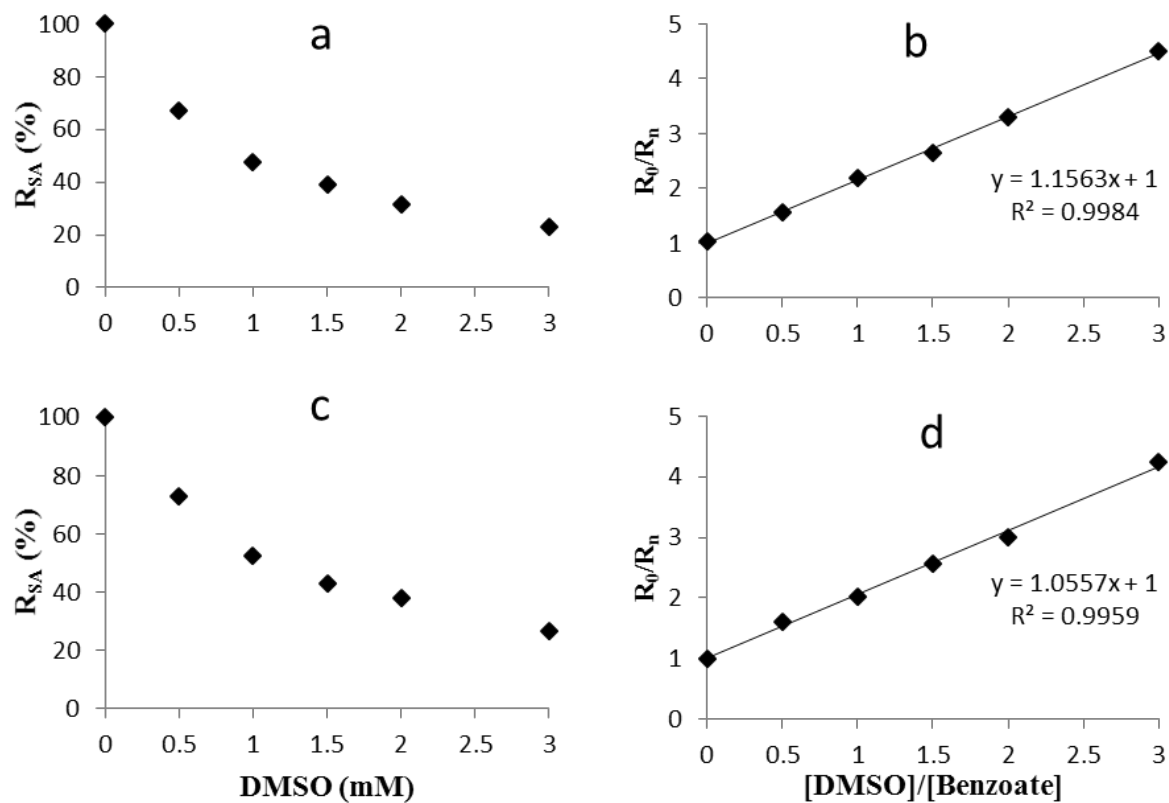

**Fig. S4.** (a) The effect of DMSO concentration on SA relative formation rate  $R_n/R_0$  (%); (b)  $R_0/R_n$  vs. [formate]/[benzoate] using 2,4-DHBA as the  $\bullet\text{OH}$  source and benzoate as the probe; (c) The effect of DMSO concentration on SA relative formation rate  $R_n/R_0$  (%); (d)  $R_n/R_0$  vs. [formate]/[benzoate]) using  $\text{H}_2\text{O}_2$  as the  $\bullet\text{OH}$  source and benzoate as the probe.

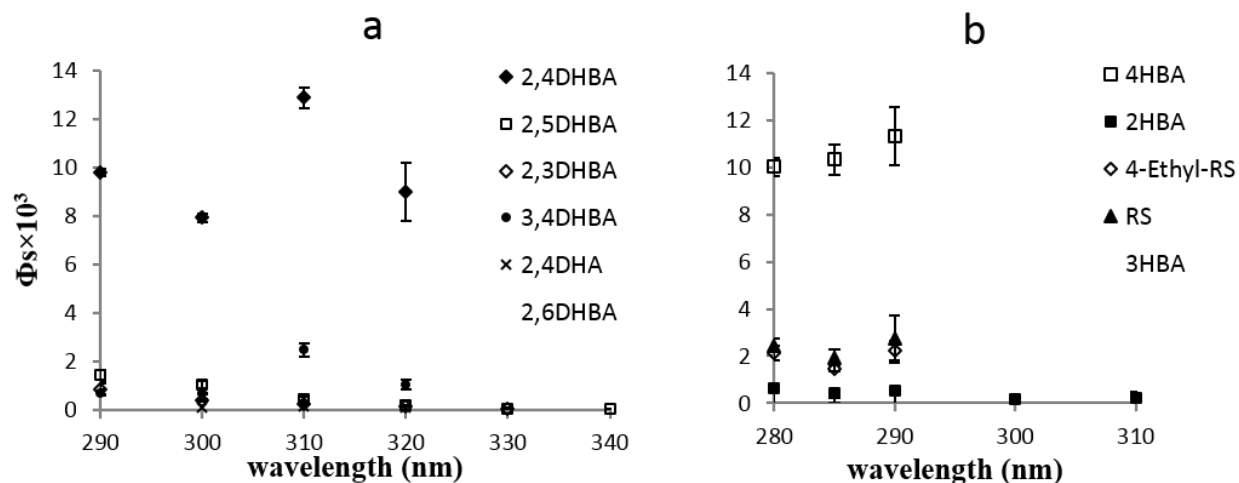

**Fig. S5.** Quantum yields ( $\Phi_s$ ) for 20  $\mu\text{M}$  of model compounds using benzene as the probe at wavelengths 290-340 nm at pH 7.  $\Phi_s$  were not shown for the wavelengths where the compounds have low absorbance ( $<5 \times 10^{-3}$ ), or  $\bullet\text{OH}$  production is undetectable. NOTATION: DHBA- dihydroxybenzoic acid, HBA - hydroxybenzoic acid, RS-resorcinol, DHA- dihydroxybenzaldehyde. The large error bars in the case of 2,4DHBA and 4HBA were due to low absorbance at the longer wavelengths.

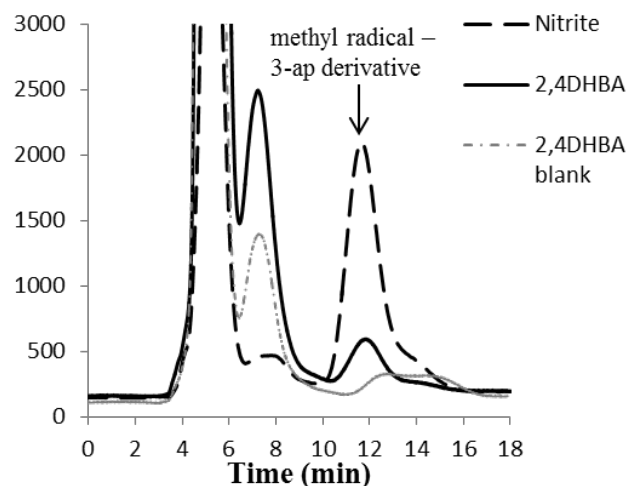

**Fig. S6.** HPLC chromatogram showing the production of the fluorescent methyl radical – 3-ap fluorescamine derivative. The “2,4-DHBA blank” represents a 2 hour irradiation of 2,4-DHBA without methane but in the presence of 3-ap. The peak was verified by irradiation of 10  $\mu$ M nitrite in the presence of 10 mM DMSO.

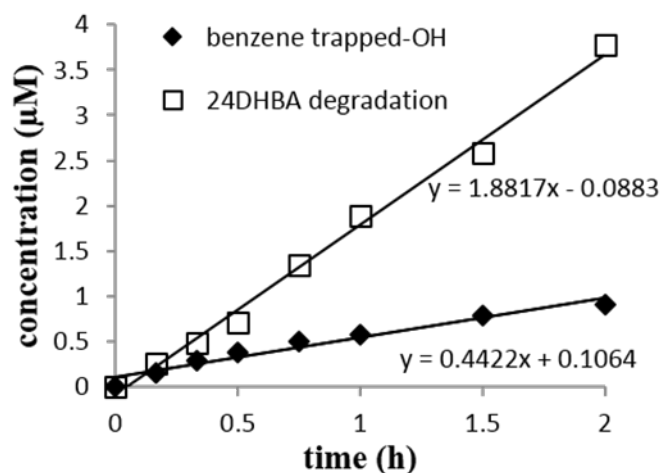

**Fig. S7.** (a) 2,4-DHBA degradation vs. benzene trapped-OH during a 2 h irradiation. The 2,4-DHBA degradation concentration was obtained by HPLC. The slopes are the 2,4-DHBA degradation and  $\bullet$ OH formation rates ( $\mu$ Mh $^{-1}$ ).
